# Supplementary material for: Wet deposition of atmospheric inorganic nitrogen at five remote sites in the Tibetan Plateau
Source: Copernicus journal article supplement (doi:10.5194/acp-15-11683-2015), 2015-10-21
Supplement: Supplementary file 1 [file acp-15-11683-2015-supplement.zip]

Table S1. Pearson correlations matrix of ionic concentrations in precipitation at five remote sites in the TP.  $N$  indicates the number of precipitation samples at each site. Only statistically significant correlation coefficient are shown ( $P < 0.05$ ).

| Sites                           |                               | Na <sup>+</sup> | NH <sub>4</sub> <sup>+</sup> | K <sup>+</sup> | Mg <sup>2+</sup> | Ca <sup>2+</sup> | Cl <sup>-</sup> | NO <sub>3</sub> <sup>-</sup> | SO <sub>4</sub> <sup>2-</sup> |
|---------------------------------|-------------------------------|-----------------|------------------------------|----------------|------------------|------------------|-----------------|------------------------------|-------------------------------|
| Southeast Tibet<br>( $N = 53$ ) | Na <sup>+</sup>               | 1               |                              |                |                  |                  |                 |                              |                               |
|                                 | NH <sub>4</sub> <sup>+</sup>  | 0.45            | 1                            |                |                  |                  |                 |                              |                               |
|                                 | K <sup>+</sup>                | 0.89            | 0.57                         | 1              |                  |                  |                 |                              |                               |
|                                 | Mg <sup>2+</sup>              | 0.81            | 0.55                         | 0.77           | 1                |                  |                 |                              |                               |
|                                 | Ca <sup>2+</sup>              | 0.69            | 0.41                         | 0.64           | 0.82             | 1                |                 |                              |                               |
|                                 | Cl <sup>-</sup>               | 0.8             | –                            | 0.83           | 0.68             | 0.48             | 1               |                              |                               |
|                                 | NO <sub>3</sub> <sup>-</sup>  | –               | 0.31                         | –              | 0.44             | 0.42             | –               | 1                            |                               |
|                                 | SO <sub>4</sub> <sup>2-</sup> | –               | 0.43                         | 0.4            | 0.61             | 0.53             | 0.35            | 0.81                         | 1                             |
| Nam Co<br>( $N = 27$ )          | Na <sup>+</sup>               | 1               |                              |                |                  |                  |                 |                              |                               |
|                                 | NH <sub>4</sub> <sup>+</sup>  | –               | 1                            |                |                  |                  |                 |                              |                               |
|                                 | K <sup>+</sup>                | 0.69            | –                            | 1              |                  |                  |                 |                              |                               |
|                                 | Mg <sup>2+</sup>              | 0.69            | 0.69                         | –              | 1                |                  |                 |                              |                               |
|                                 | Ca <sup>2+</sup>              | 0.52            | 0.75                         | –              | 0.91             | 1                |                 |                              |                               |
|                                 | Cl <sup>-</sup>               | 0.74            | –                            | 0.84           | –                | –                | 1               |                              |                               |
|                                 | NO <sub>3</sub> <sup>-</sup>  | –               | 0.91                         | –              | 0.67             | 0.8              | –               | 1                            |                               |
|                                 | SO <sub>4</sub> <sup>2-</sup> | 0.55            | 0.77                         | –              | 0.9              | 0.88             | –               | 0.71                         | 1                             |
| Qomolangma<br>( $N = 30$ )      | Na <sup>+</sup>               | 1               |                              |                |                  |                  |                 |                              |                               |
|                                 | NH <sub>4</sub> <sup>+</sup>  | 0.45            | 1                            |                |                  |                  |                 |                              |                               |
|                                 | K <sup>+</sup>                | 0.83            | 0.63                         | 1              |                  |                  |                 |                              |                               |
|                                 | Mg <sup>2+</sup>              | 0.61            | –                            | 0.69           | 1                |                  |                 |                              |                               |
|                                 | Ca <sup>2+</sup>              | –               | –                            | –              | 0.85             | 1                |                 |                              |                               |
|                                 | Cl <sup>-</sup>               | 1               | 0.47                         | 0.83           | 0.58             | –                | 1               |                              |                               |
|                                 | NO <sub>3</sub> <sup>-</sup>  | 0.42            | –                            | 0.5            | 0.41             | –                | 0.42            | 1                            |                               |
|                                 | SO <sub>4</sub> <sup>2-</sup> | 0.8             | –                            | 0.82           | 0.84             | 0.57             | 0.78            | 0.55                         | 1                             |
| Ngari<br>( $N = 39$ )           | Na <sup>+</sup>               | 1               |                              |                |                  |                  |                 |                              |                               |
|                                 | NH <sub>4</sub> <sup>+</sup>  | 0.35            | 1                            |                |                  |                  |                 |                              |                               |
|                                 | K <sup>+</sup>                | 0.7             | 0.77                         | 1              |                  |                  |                 |                              |                               |
|                                 | Mg <sup>2+</sup>              | 0.89            | 0.28                         | 0.54           | 1                |                  |                 |                              |                               |
|                                 | Ca <sup>2+</sup>              | 0.56            | –                            | 0.44           | 0.59             | 1                |                 |                              |                               |
|                                 | Cl <sup>-</sup>               | 0.81            | 0.37                         | 0.68           | 0.65             | 0.39             | 1               |                              |                               |
|                                 | NO <sub>3</sub> <sup>-</sup>  | 0.32            | 0.47                         | –              | 0.38             | –                | –               | 1                            |                               |
|                                 | SO <sub>4</sub> <sup>2-</sup> | 0.72            | –                            | 0.4            | 0.63             | 0.84             | 0.52            | 0.4                          | 1                             |
| Muztagh Ata<br>( $N = 19$ )     | Na <sup>+</sup>               | 1               |                              |                |                  |                  |                 |                              |                               |
|                                 | NH <sub>4</sub> <sup>+</sup>  | –               | 1                            |                |                  |                  |                 |                              |                               |
|                                 | K <sup>+</sup>                | 0.82            | –                            | 1              |                  |                  |                 |                              |                               |
|                                 | Mg <sup>2+</sup>              | 0.56            | –                            | 0.71           | 1                |                  |                 |                              |                               |
|                                 | Ca <sup>2+</sup>              | 0.49            | –                            | 0.74           | 0.92             | 1                |                 |                              |                               |
|                                 | Cl <sup>-</sup>               | 0.96            | –                            | 0.74           | 0.56             | –                | 1               |                              |                               |
|                                 | NO <sub>3</sub> <sup>-</sup>  | –               | –                            | 0.51           | 0.88             | 0.77             | –               | 1                            |                               |
|                                 | SO <sub>4</sub> <sup>2-</sup> | 0.5             | –                            | 0.6            | 0.9              | 0.81             | 0.56            | 0.68                         | 1                             |

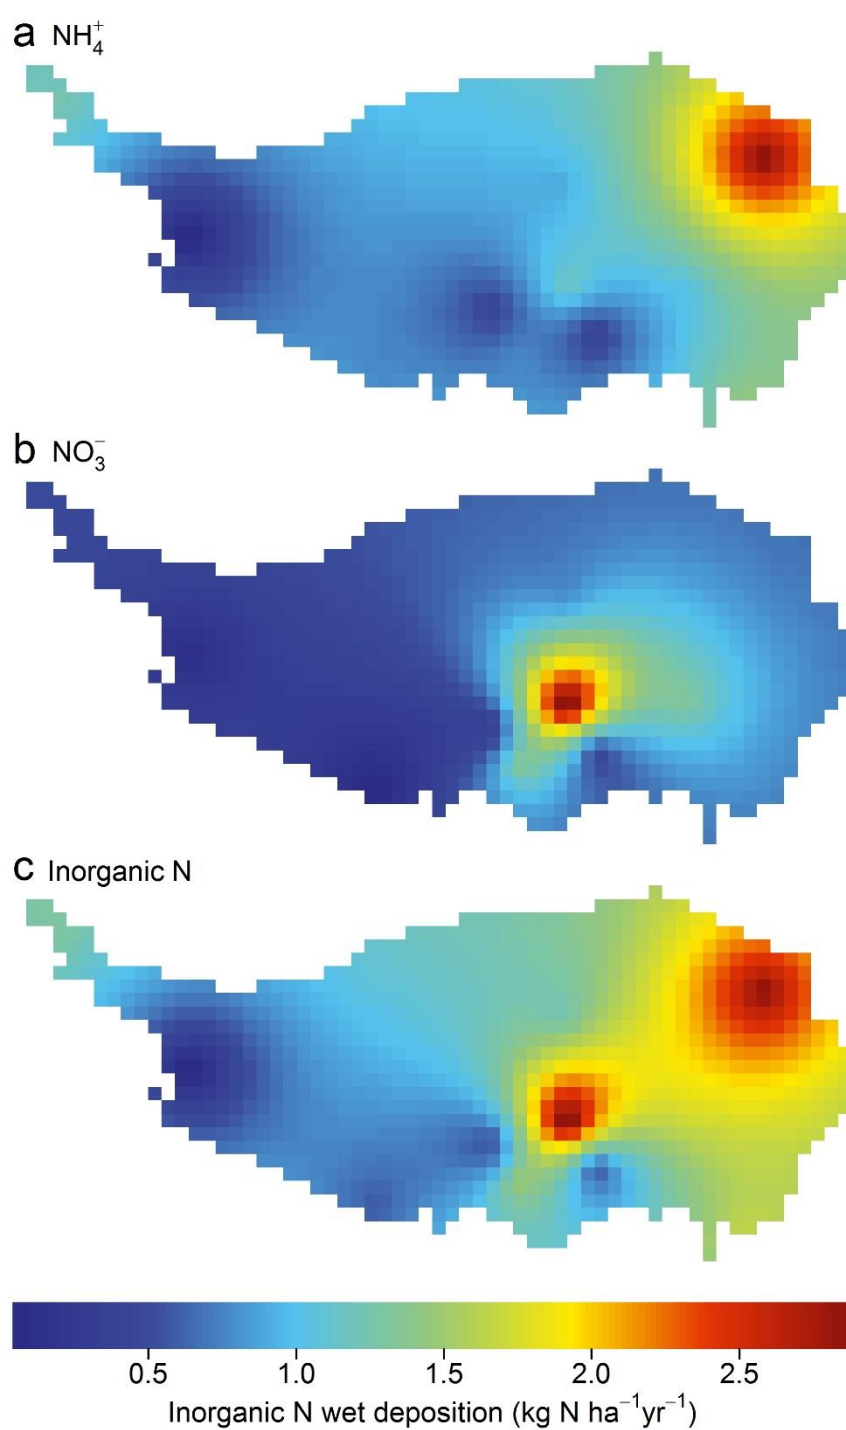

Figure S1. Spatial distribution of inorganic N wet deposition in the TP. Kriging interpolation technique was used based on *in situ* measurements at the 5 observation sites in this study and 7 observation sites in previous studies. The spatial data was provided as a NetCDF file in the supplementary material.
