# Supplementary material for: Wet deposition of atmospheric inorganic nitrogen at five remote sites in the Tibetan Plateau
Source: Copernicus journal article supplement (doi:10.5194/acp-15-11683-2015), 2015-10-21
Supplement: Supplementary file 2 [file acp-15-11683-2015-supplement.zip]

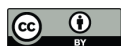

## *Supplement of*

# **Wet deposition of atmospheric inorganic nitrogen at five remote sites in the Tibetan Plateau**

**Y. W. Liu et al.**

*Correspondence to:* Xu-Ri (xu-ri@itpcas.ac.cn)

- [acp-15-11683-2015-supplement-title-page.pdf](#)
- [LiuYW\\_ACP\\_2015\\_Supplement](#)
  - [Supplement1\\_Figs\\_Tables.pdf](#)
  - [Supplement2\\_Inorganic\\_N\\_wet\\_deposition\\_in\\_the\\_TP.nc](#)

The copyright of individual parts of the supplement might differ from the CC-BY 3.0 licence.
